# Supplementary material for: Neuroprotective Effect of Ceftriaxone on MPTP‐Induced Parkinson’s Disease Mouse Model by Regulating Inflammation and Intestinal Microbiota
Source: Hindawi journal article supplement (doi:10.1155/2021/9424582), 2021-01-01
Supplement: f1 [file 9424582.f1.pdf]

**Graphical Abstract** *Neuroprotective effect of ceftriaxone on MPTP induced Parkinson's disease mouse model by regulating inflammation and intestinal microbiota*

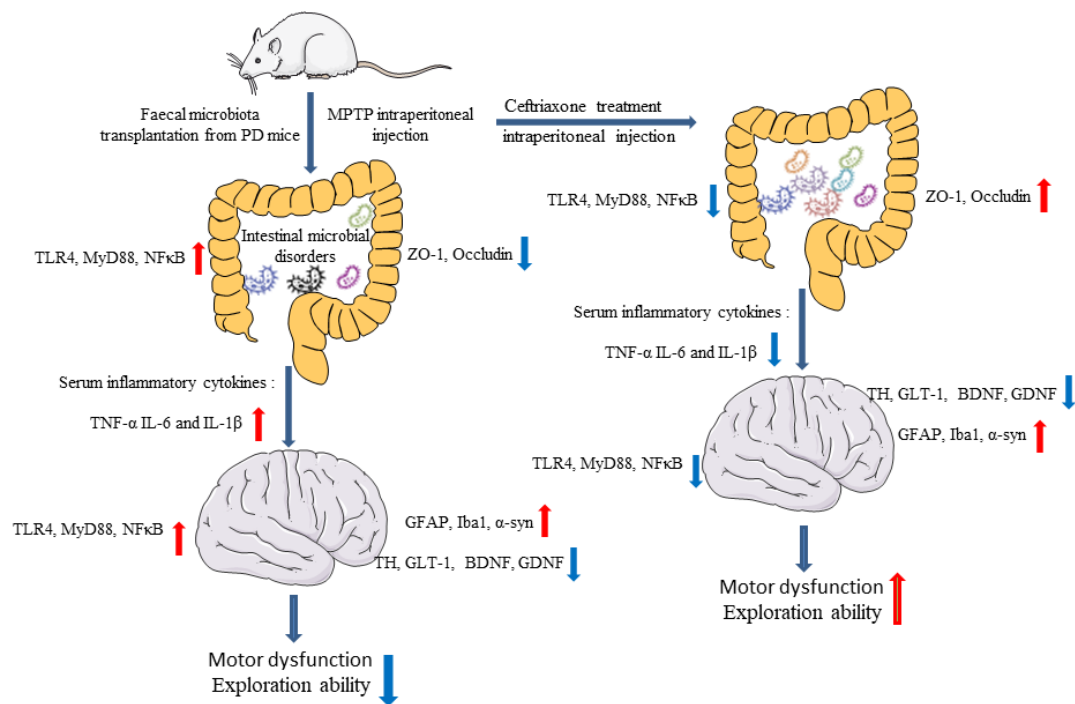

1

2 Supplemental Figure 1: The graphical abstract of our study. Ceftriaxone can alleviate  
 3 the motor dysfunction and decreased exploration ability. In addition, it also plays an  
 4 important role in increasing the integrity of the intestinal barrier, reducing the  
 5 inflammation of the colon and brain, and has the neuroprotective effect, and its  
 6 neuroprotective effect may be through regulating inflammation and intestinal  
 7 microbiota.
